# Supplementary material for: Phylogeny and adaptive evolution of subgenus Rhizirideum (Amaryllidaceae, Allium) based on plastid genomes
Source: PubMed Central journal article supplement (PMC9890777; doi:10.1186/s12870-022-03993-z), 2023-02-01
Supplement: 12870_2022_3993_MOESM1_ESM.pdf [file 12870_2022_3993_MOESM1_ESM.pdf]

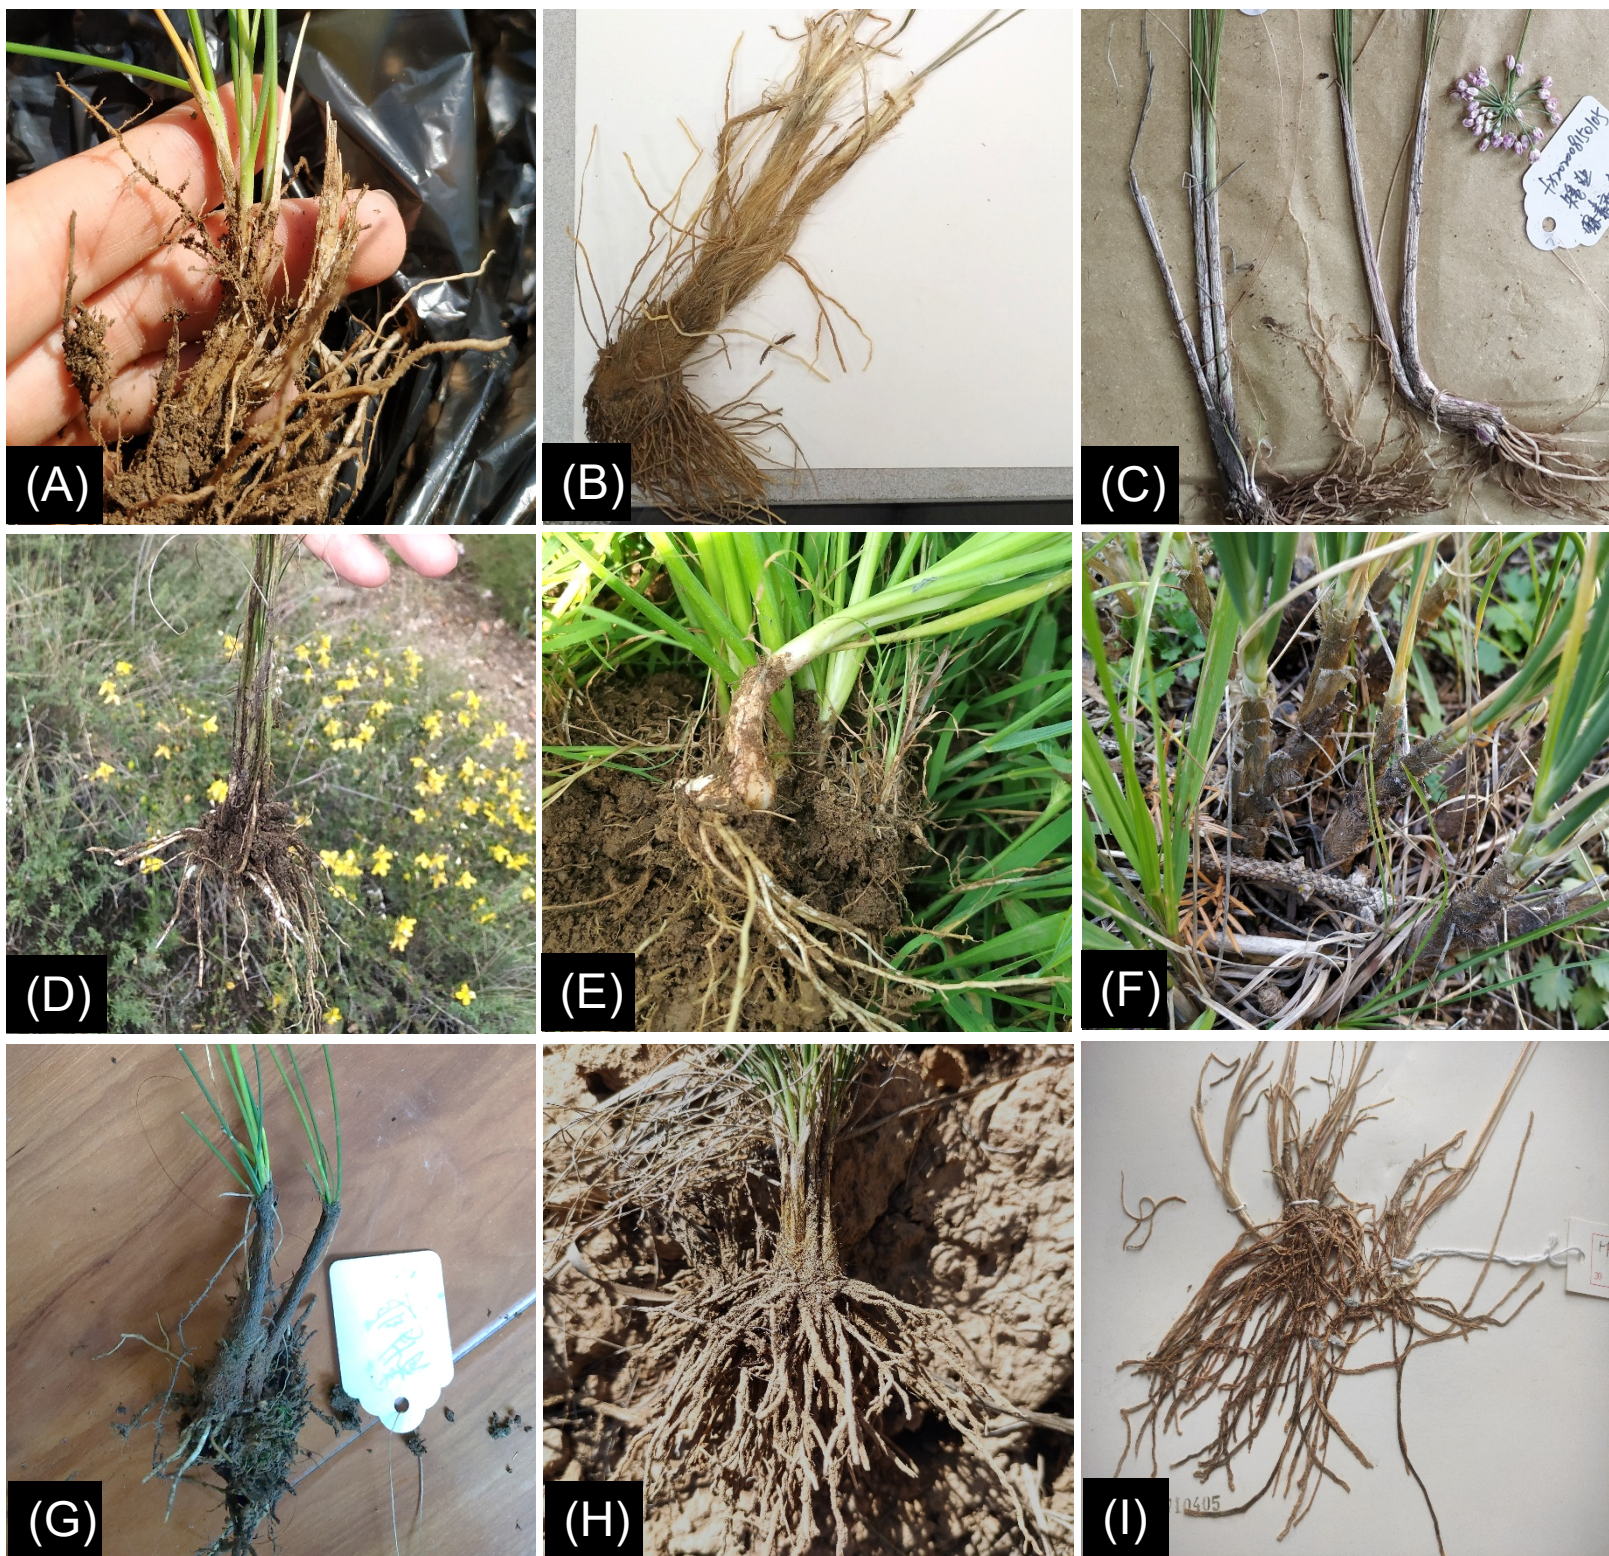

Figure S1. Bulb shapes of nine species. (A), *A. bidentatum*; (B), *A. mongolicum*; (C), *A. anisopodium*; (D), *A. tenuissimum*; (E), *A. senescens*; (F), *A. eduardii*; (G), *A. przewalskianum*; (H), *A. polyrhizum*; (I), *A. caespitosum*
